# Supplementary material
Source: MDPI journal article supplement (https://www.mdpi.com/1424-8247/16/10/1378)
Supplement: s1 [file s1]

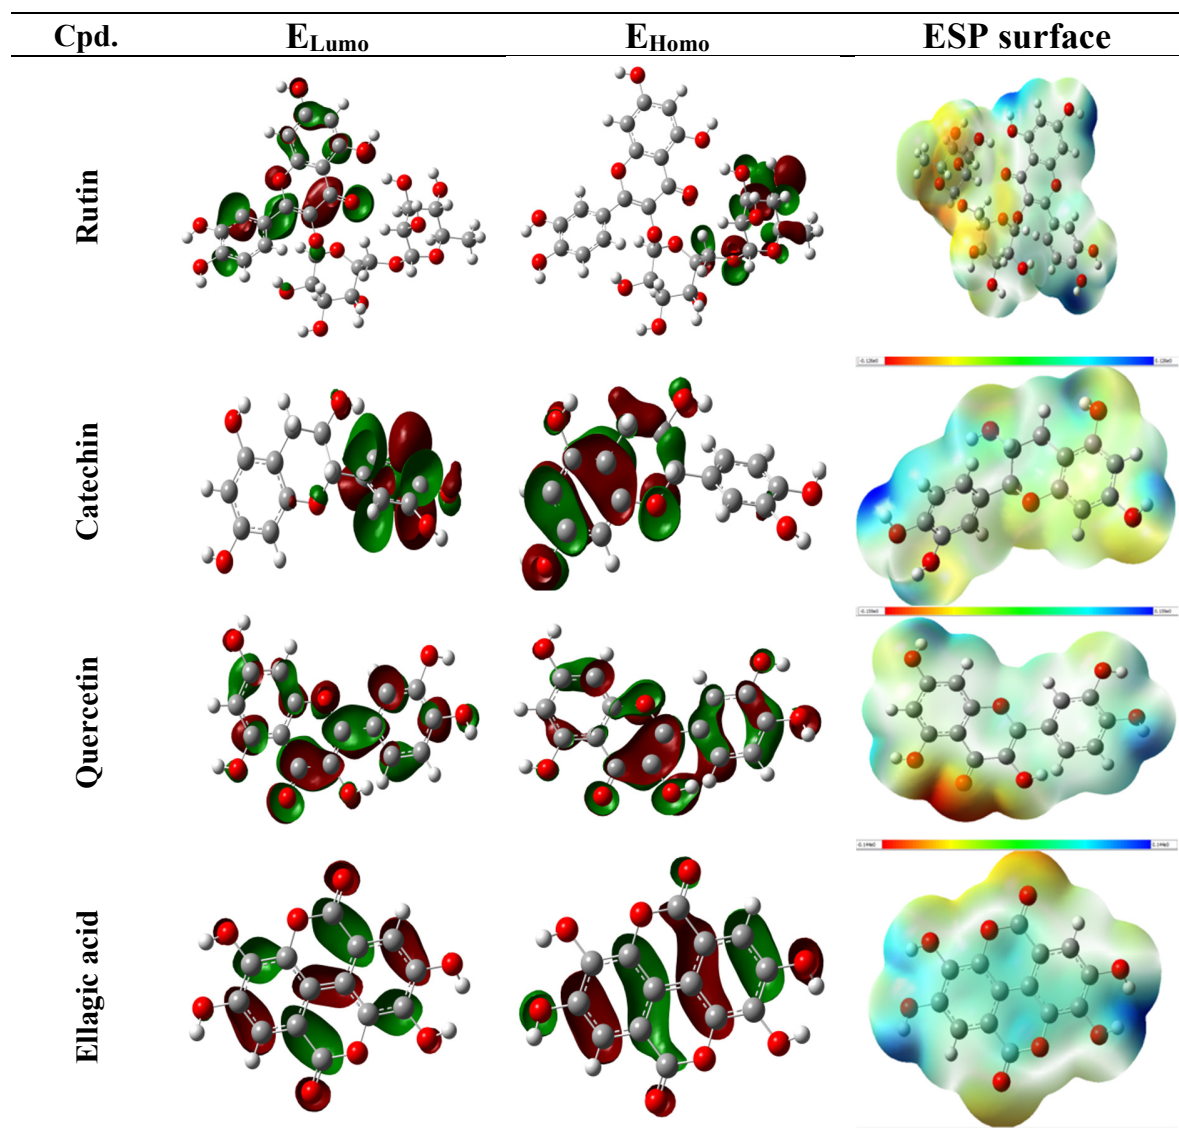

|                  |                                                                                     |                                                                                      |                                                                                       |
|------------------|-------------------------------------------------------------------------------------|--------------------------------------------------------------------------------------|---------------------------------------------------------------------------------------|
| Chlorogenic acid | 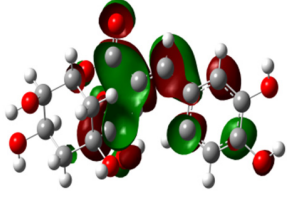   |    |    |
| Kaempferol       |    |    |    |
| Gallic acid      |   |   |   |
| Methyl gallate   |  |  |  |
| Caffeic acid     |  |  |  |
| Coumaric acid    |  |  |  |

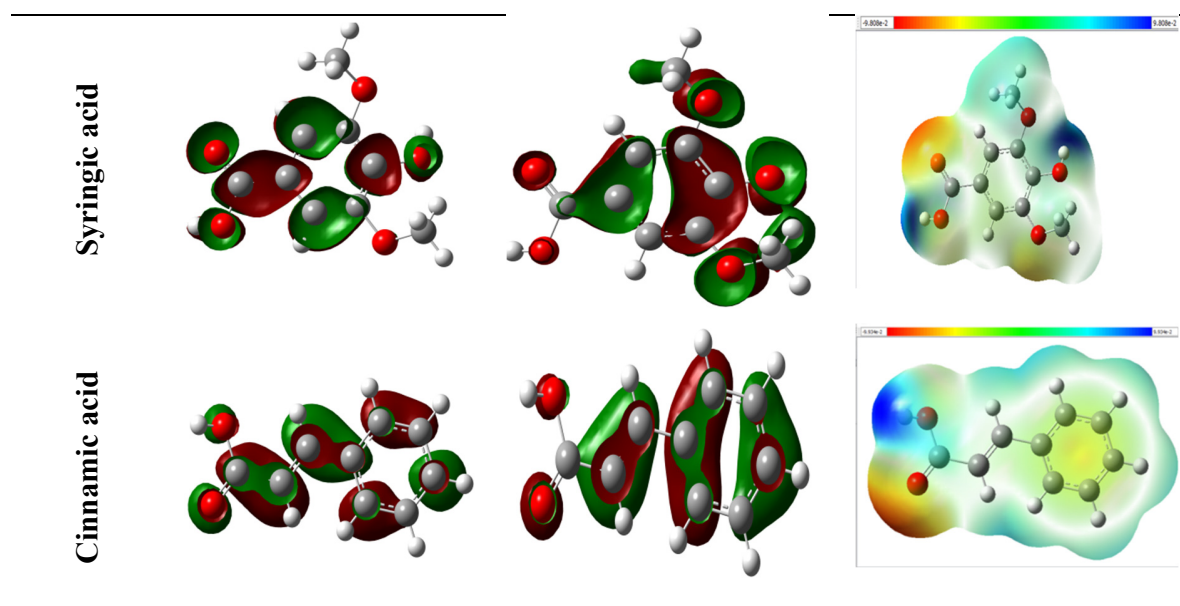

**Figure S1.** Frontier molecular orbitals (HOMOs, LUMOs) and Molecular electrostatic potential (MEP) surface of all detected phenolic compounds by using DFT/B3LYP/6-311++G(2d,2p) method

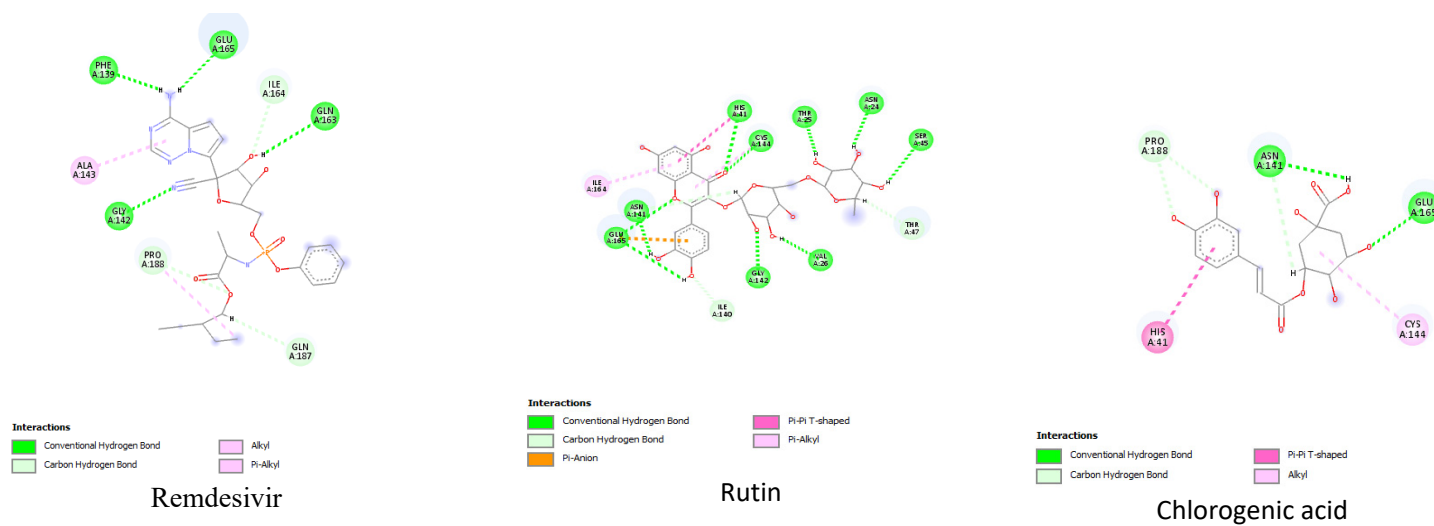

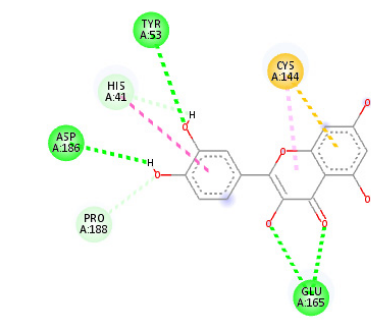

**Interactions**

- Conventional Hydrogen Bond
- Carbon Hydrogen Bond
- Pi-Donor Hydrogen Bond
- Pi-Sulfur
- Pi-Pi T-shaped
- Pi-Alkyl

Quercetin

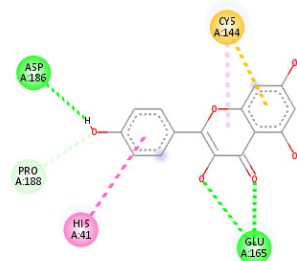

**Interactions**

- Conventional Hydrogen Bond
- Carbon Hydrogen Bond
- Pi-Sulfur
- Pi-Pi T-shaped
- Pi-Alkyl

Kaempferol

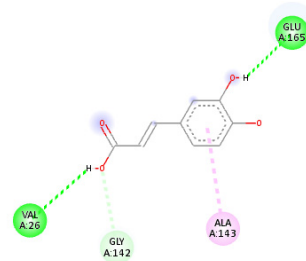

**Interactions**

- Conventional Hydrogen Bond
- Carbon Hydrogen Bond
- Pi-Alkyl

Caffeic acid

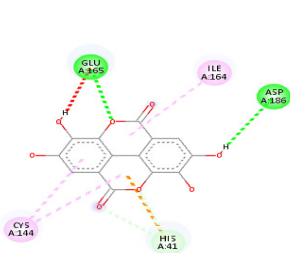

**Interactions**

- Conventional Hydrogen Bond
- Carbon Hydrogen Bond
- Unfavorable Donor-Donor
- Pi-Cation
- Pi-Alkyl

Ellagic acid

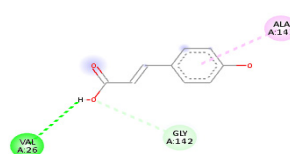

**Interactions**

- Conventional Hydrogen Bond
- Carbon Hydrogen Bond
- Pi-Alkyl

Coumaric acid

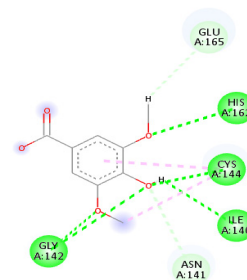

**Interactions**

- Conventional Hydrogen Bond
- Carbon Hydrogen Bond
- Alkyl
- Pi-Alkyl

Syringic acid

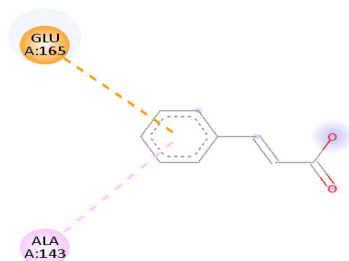

**Interactions**

- Pi-Anion
- Pi-Alkyl

Cinnamic acid

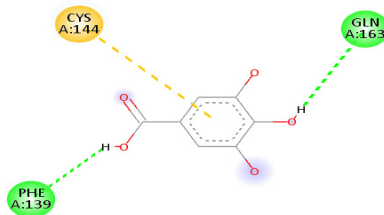

**Interactions**

- Conventional Hydrogen Bond
- Pi-Sulfur

Gallic acid

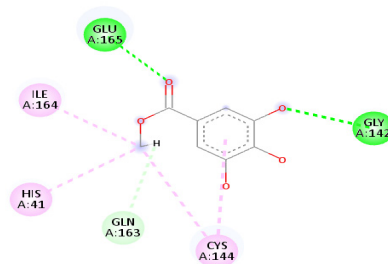

**Interactions**

- Conventional Hydrogen Bond
- Carbon Hydrogen Bond
- Alkyl
- Pi-Alkyl

Methyl gallate

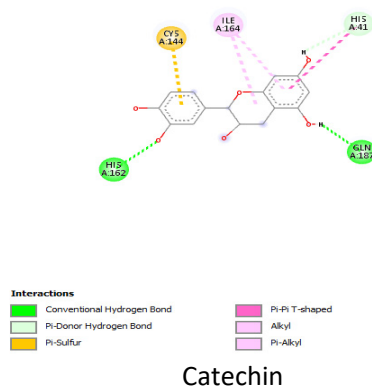

**Figure S2.** 2D interactions 12 phenolic compounds of GCAE and Remdesivir docked on HCoV-229E M<sup>pro</sup> (PDB ID: 2ZU2)

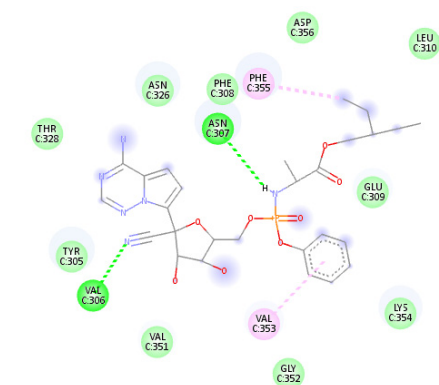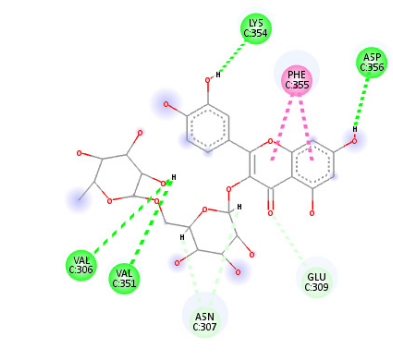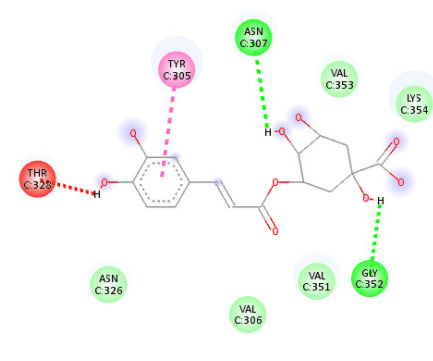

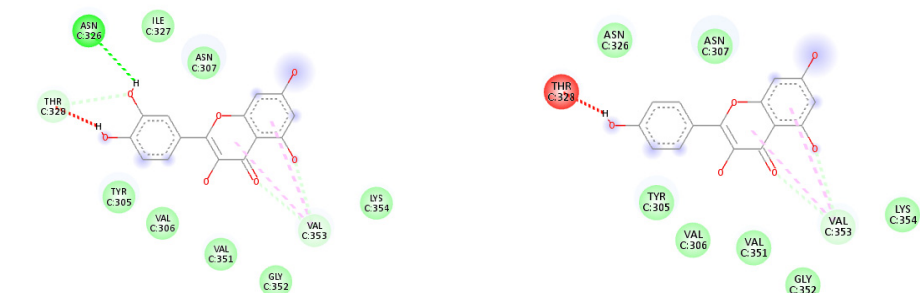

**Interactions**

- van der Waals
- Conventional Hydrogen Bond
- Carbon Hydrogen Bond
- Unfavorable Donor-Donor
- Pi-Alkyl

Quercetin

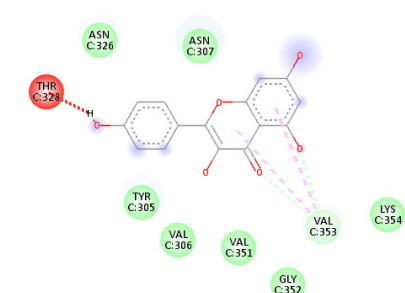

**Interactions**

- van der Waals
- Carbon Hydrogen Bond
- Unfavorable Donor-Donor
- Pi-Alkyl

Kaempferol

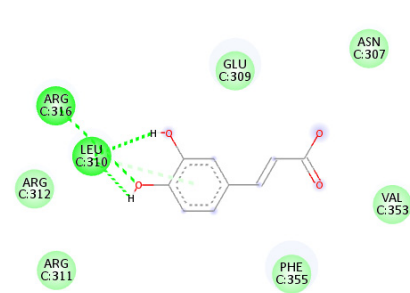

**Interactions**

- van der Waals
- Conventional Hydrogen Bond
- Pi-Donor Hydrogen Bond
- Pi-Alkyl

Caffeic acid

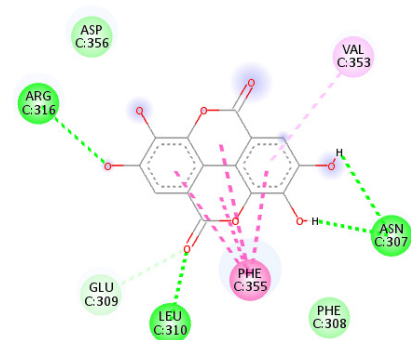

**Interactions**

- van der Waals
- Conventional Hydrogen Bond
- Carbon Hydrogen Bond
- Pi-Pi Stacked
- Pi-Alkyl

Ellagic acid

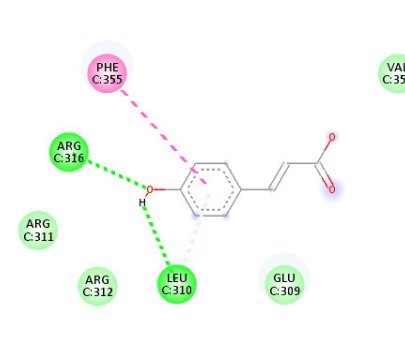

**Interactions**

- van der Waals
- Conventional Hydrogen Bond
- Pi-Donor Hydrogen Bond
- Pi-Pi T-shaped
- Pi-Alkyl

Coumaric acid

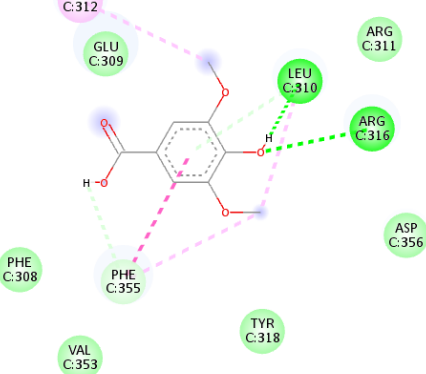

**Interactions**

- van der Waals
- Conventional Hydrogen Bond
- Pi-Donor Hydrogen Bond
- Pi-Pi T-shaped
- Alkyl
- Pi-Alkyl

Syringic acid

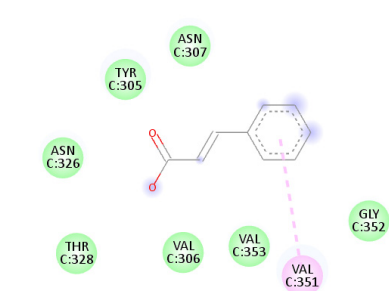

**Interactions**

- van der Waals
- Pi-Alkyl

Cinnamic acid

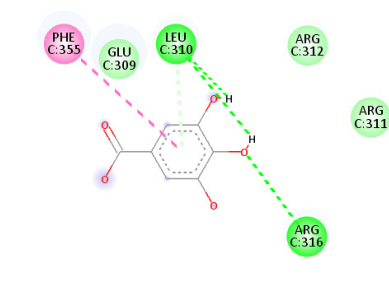

**Interactions**

- van der Waals
- Conventional Hydrogen Bond
- Pi-Donor Hydrogen Bond
- Pi-Pi T-shaped
- Pi-Alkyl

Gallic acid

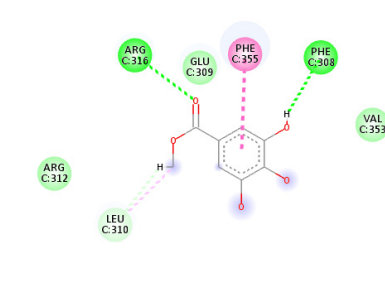

**Interactions**

- van der Waals
- Conventional Hydrogen Bond
- Carbon Hydrogen Bond
- Pi-Pi Stacked
- Alkyl

Methyl gallate

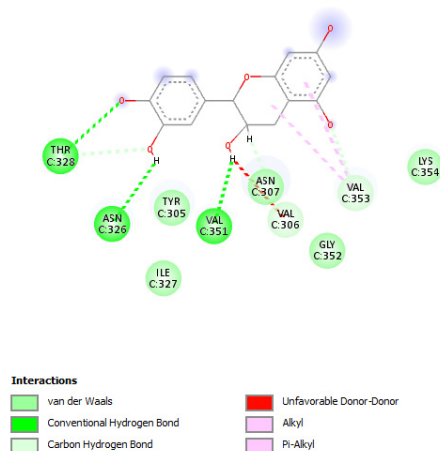

Catechin

**Figure S3.** 2D interactions 12 phenolic compounds of GCAE and Remdesivir docked on HCoV-229E RBD Class V (PDB ID: 6U7G)

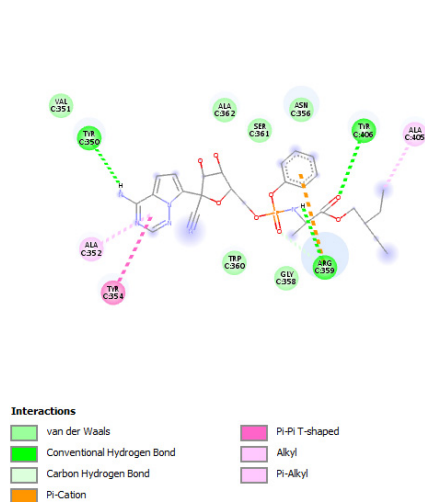

Remdesivir

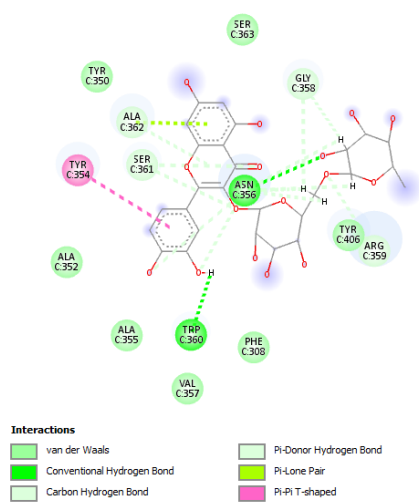

Rutin

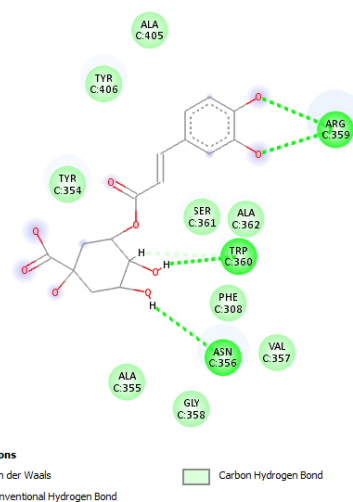

Chlorogenic acid

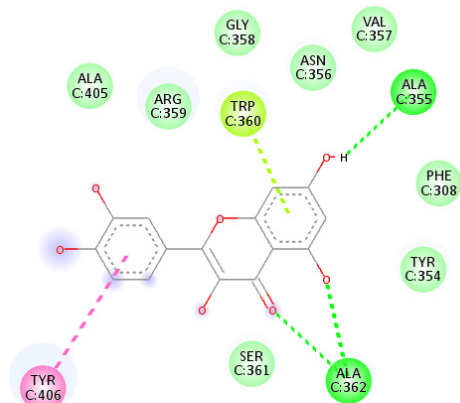

**Interactions**

- van der Waals
- Conventional Hydrogen Bond
- Pi-Lone Pair
- Pi-Pi T-shaped

Quercetin

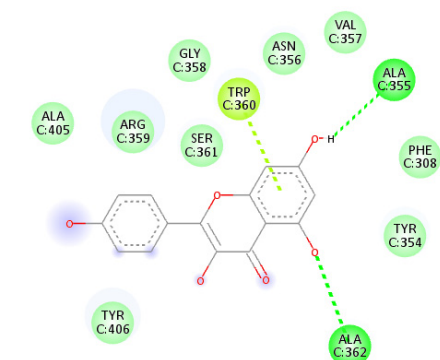

**Interactions**

- van der Waals
- Conventional Hydrogen Bond
- Pi-Lone Pair

Kaempferol

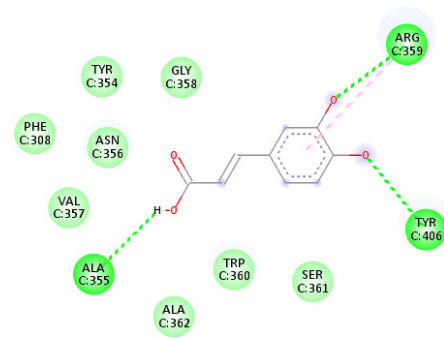

**Interactions**

- van der Waals
- Conventional Hydrogen Bond
- Carbon Hydrogen Bond
- Pi-Alkyl

Caffeic acid

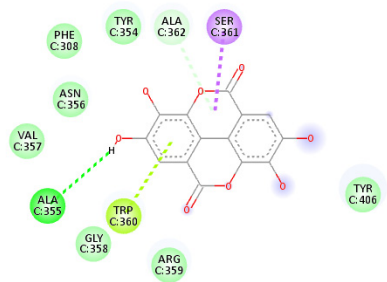

**Interactions**

- van der Waals
- Conventional Hydrogen Bond
- Pi-Donor Hydrogen Bond
- Pi-Sigma
- Pi-Lone Pair
- Pi-Alkyl

Ellagic acid

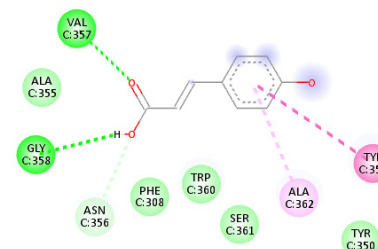

**Interactions**

- van der Waals
- Conventional Hydrogen Bond
- Carbon Hydrogen Bond
- Pi-Pi Stacked
- Pi-Alkyl

Coumaric acid

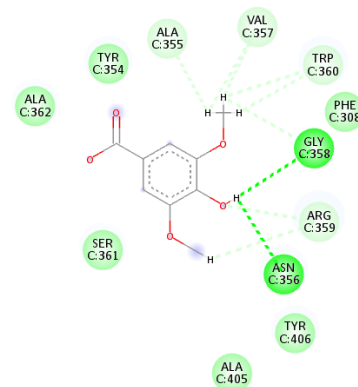

**Interactions**

- van der Waals
- Conventional Hydrogen Bond
- Carbon Hydrogen Bond

Syringic acid

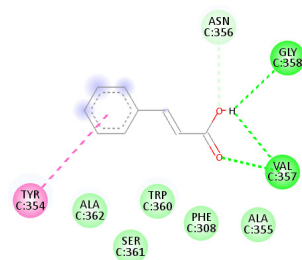

**Interactions**

- van der Waals
- Conventional Hydrogen Bond
- Carbon Hydrogen Bond
- Pi-Pi Stacked

Cinnamic acid

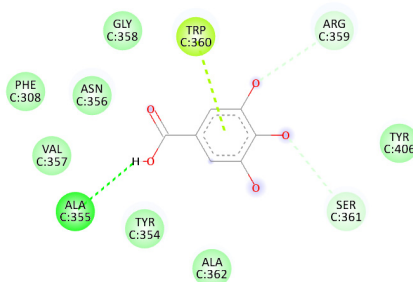

**Interactions**

- van der Waals
- Conventional Hydrogen Bond
- Carbon Hydrogen Bond
- Pi-Lone Pair

Gallic acid

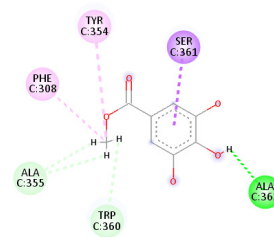

**Interactions**

- Conventional Hydrogen Bond
- Carbon Hydrogen Bond
- Pi-Sigma
- Pi-Alkyl

Methyl gallate

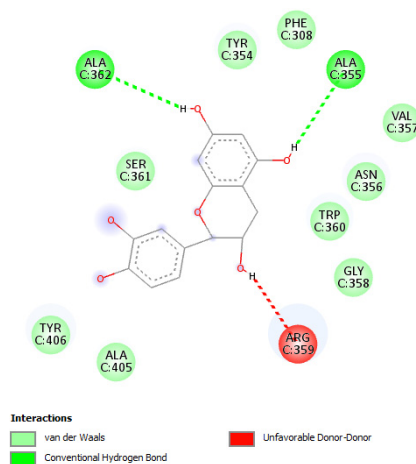

Catechin

**Figure S4.** 2D interactions 12 phenolic compounds of GCAE and Remdesivir docked on HCoV-229E spike protein (PDB ID: 7VN9)

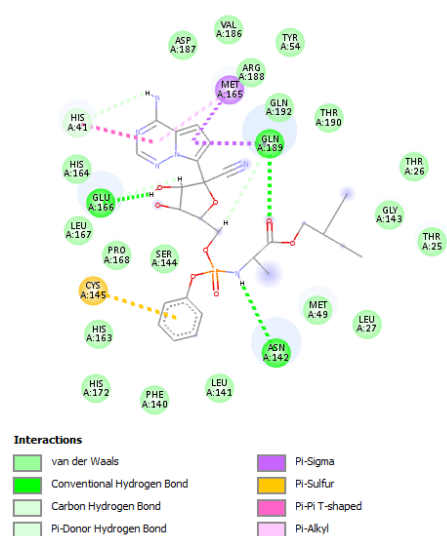

Remdesivir

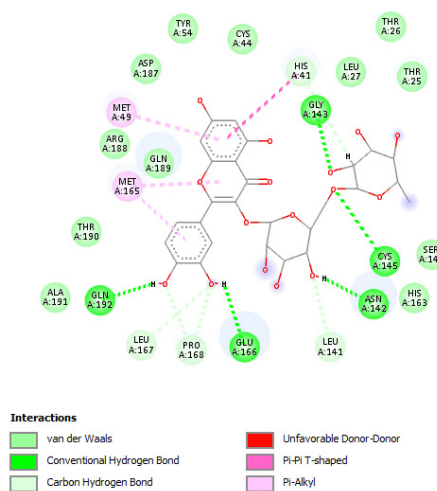

Rutin

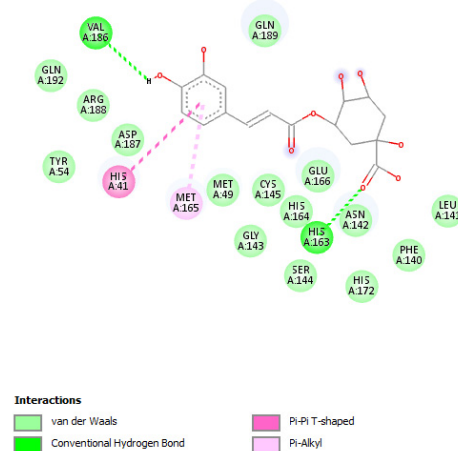

Chlorogenic acid

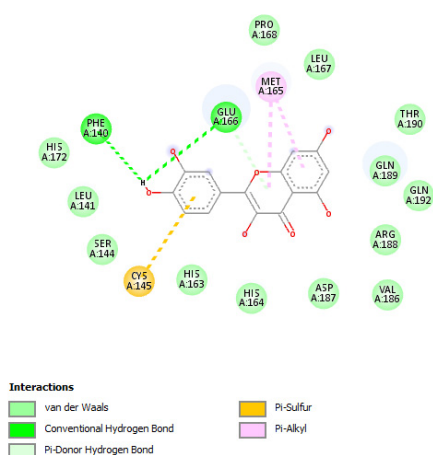

Quercetin

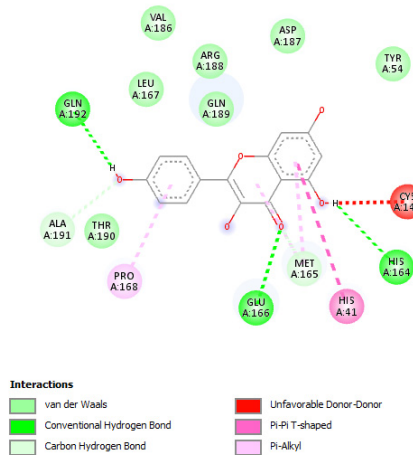

Kaempferol

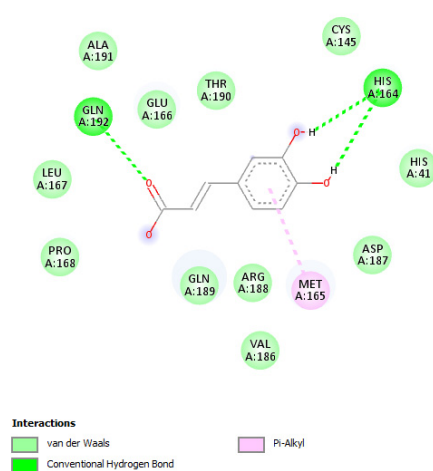

Caffeic acid

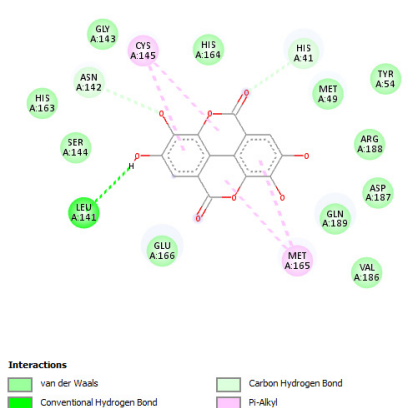

Ellagic acid

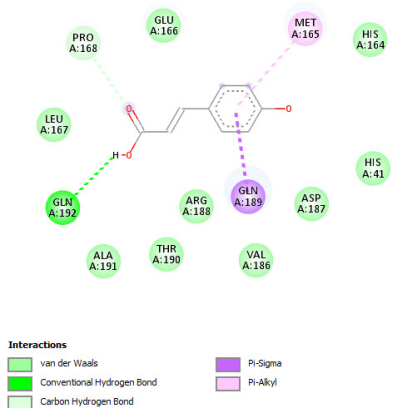

Coumaric acid

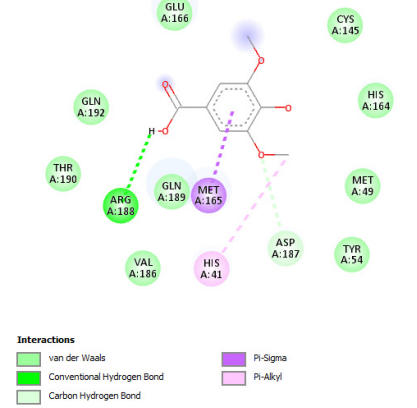

Syringic acid

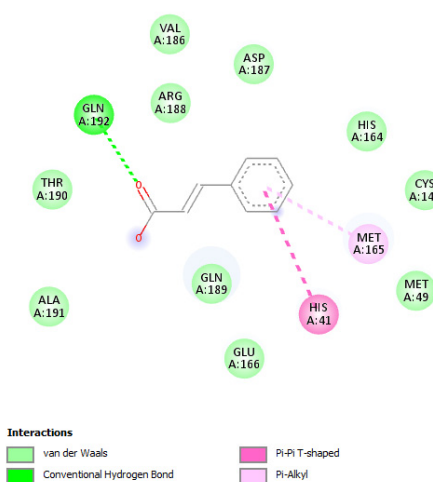

Cinnamic acid

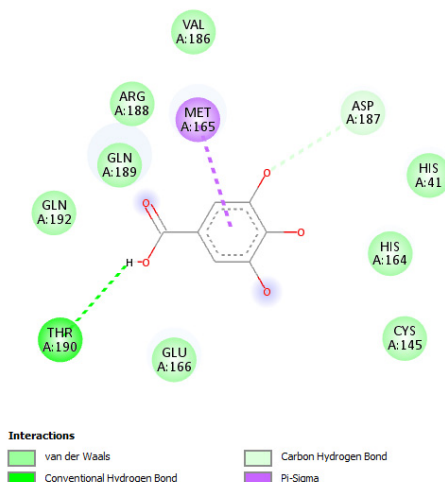

Gallic acid

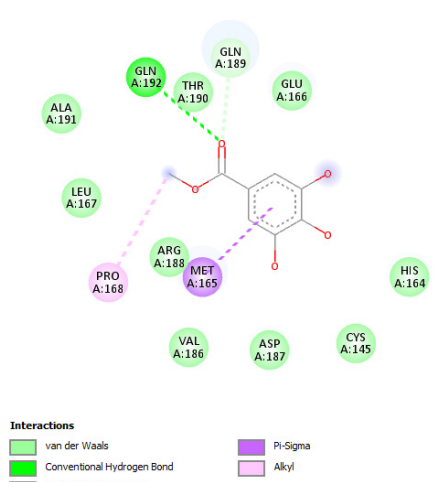

Methyl gallate

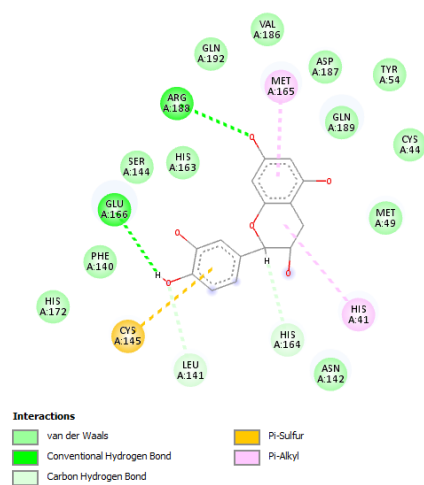

Catechin

**Figure S5.** 2D interactions 12 phenolic compounds of GCAE and Remdesivir docked on SARS-CoV-2 M<sup>pro</sup> (PDB ID: 6WTT)
